# Supplementary figures and images for: Comprehensive method for producing high-affinity mouse monoclonal antibodies of various isotypes against (4-hydroxy-3-nitrophenyl)acetyl (NP) hapten
Source: PubMed Central journal article supplement — Heliyon. 2024 Nov 29;10(23):e40837. doi: 10.1016/j.heliyon.2024.e40837 (PMC11652855; doi:10.1016/j.heliyon.2024.e40837), 2024-11-29

Yoshizato et al.  
Fig. S1

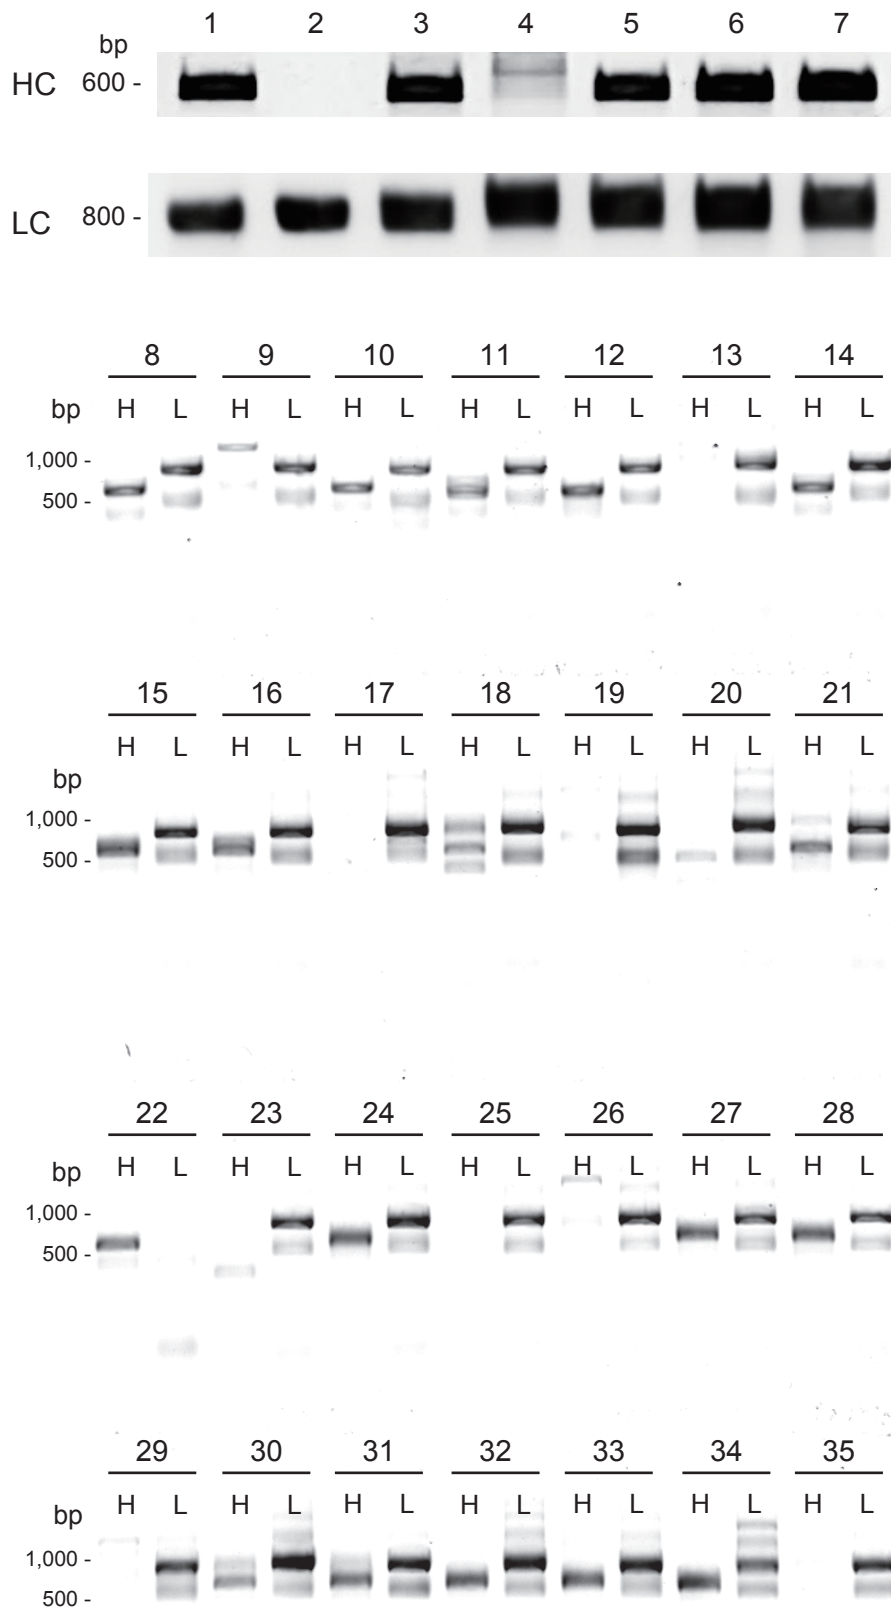

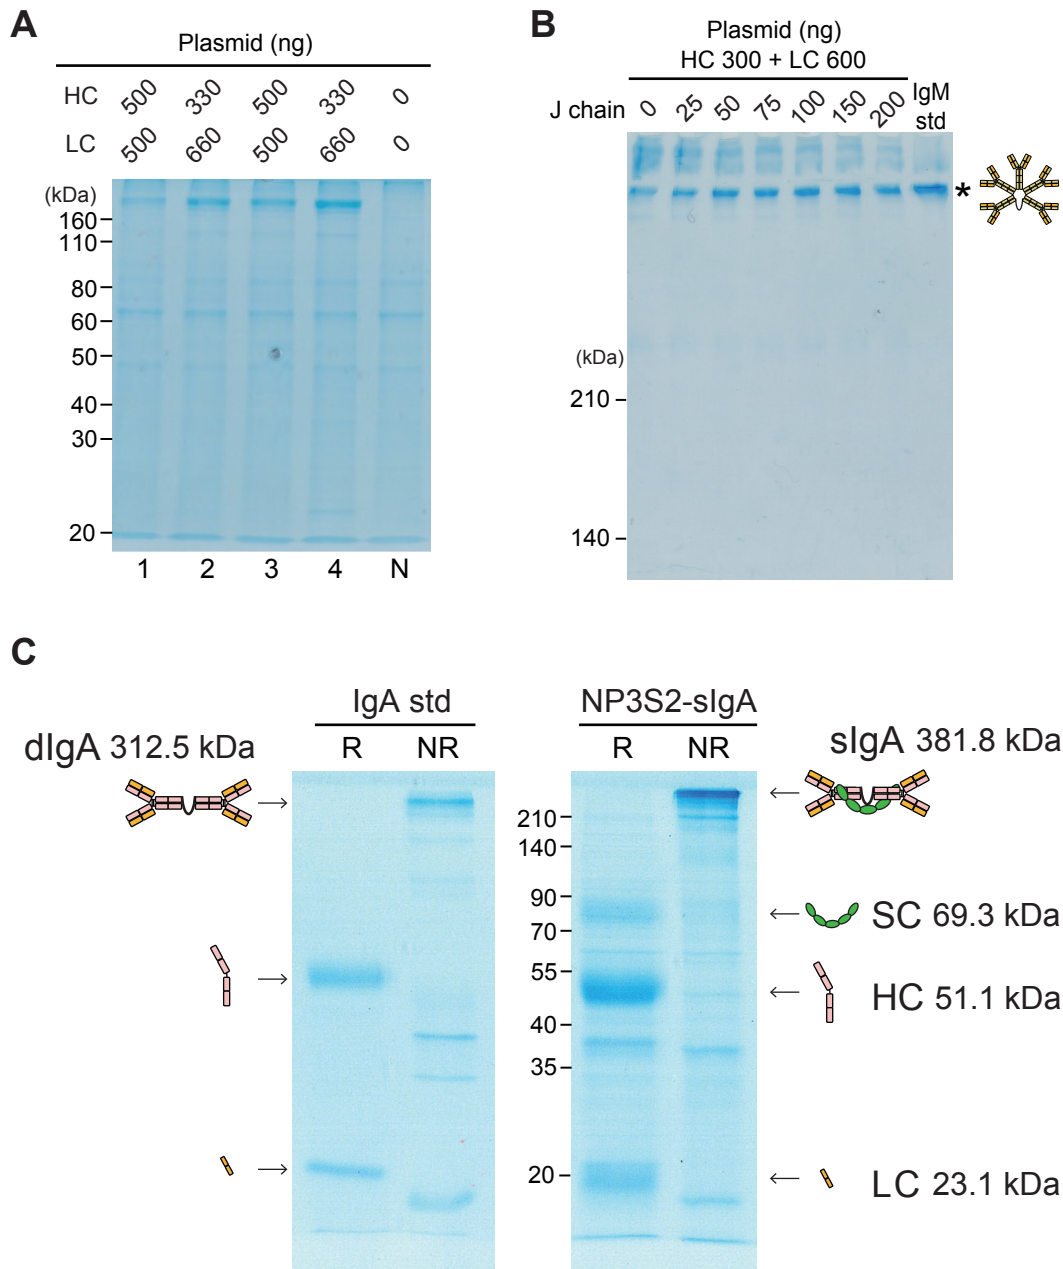

Supplement: mmc3.pdf [file mmc3.pdf]
